# Supplementary material
Source: publisher figshare collection journal article supplement (https://karger.figshare.com/ndownloader/files/13755515)

**Supplementary Figure
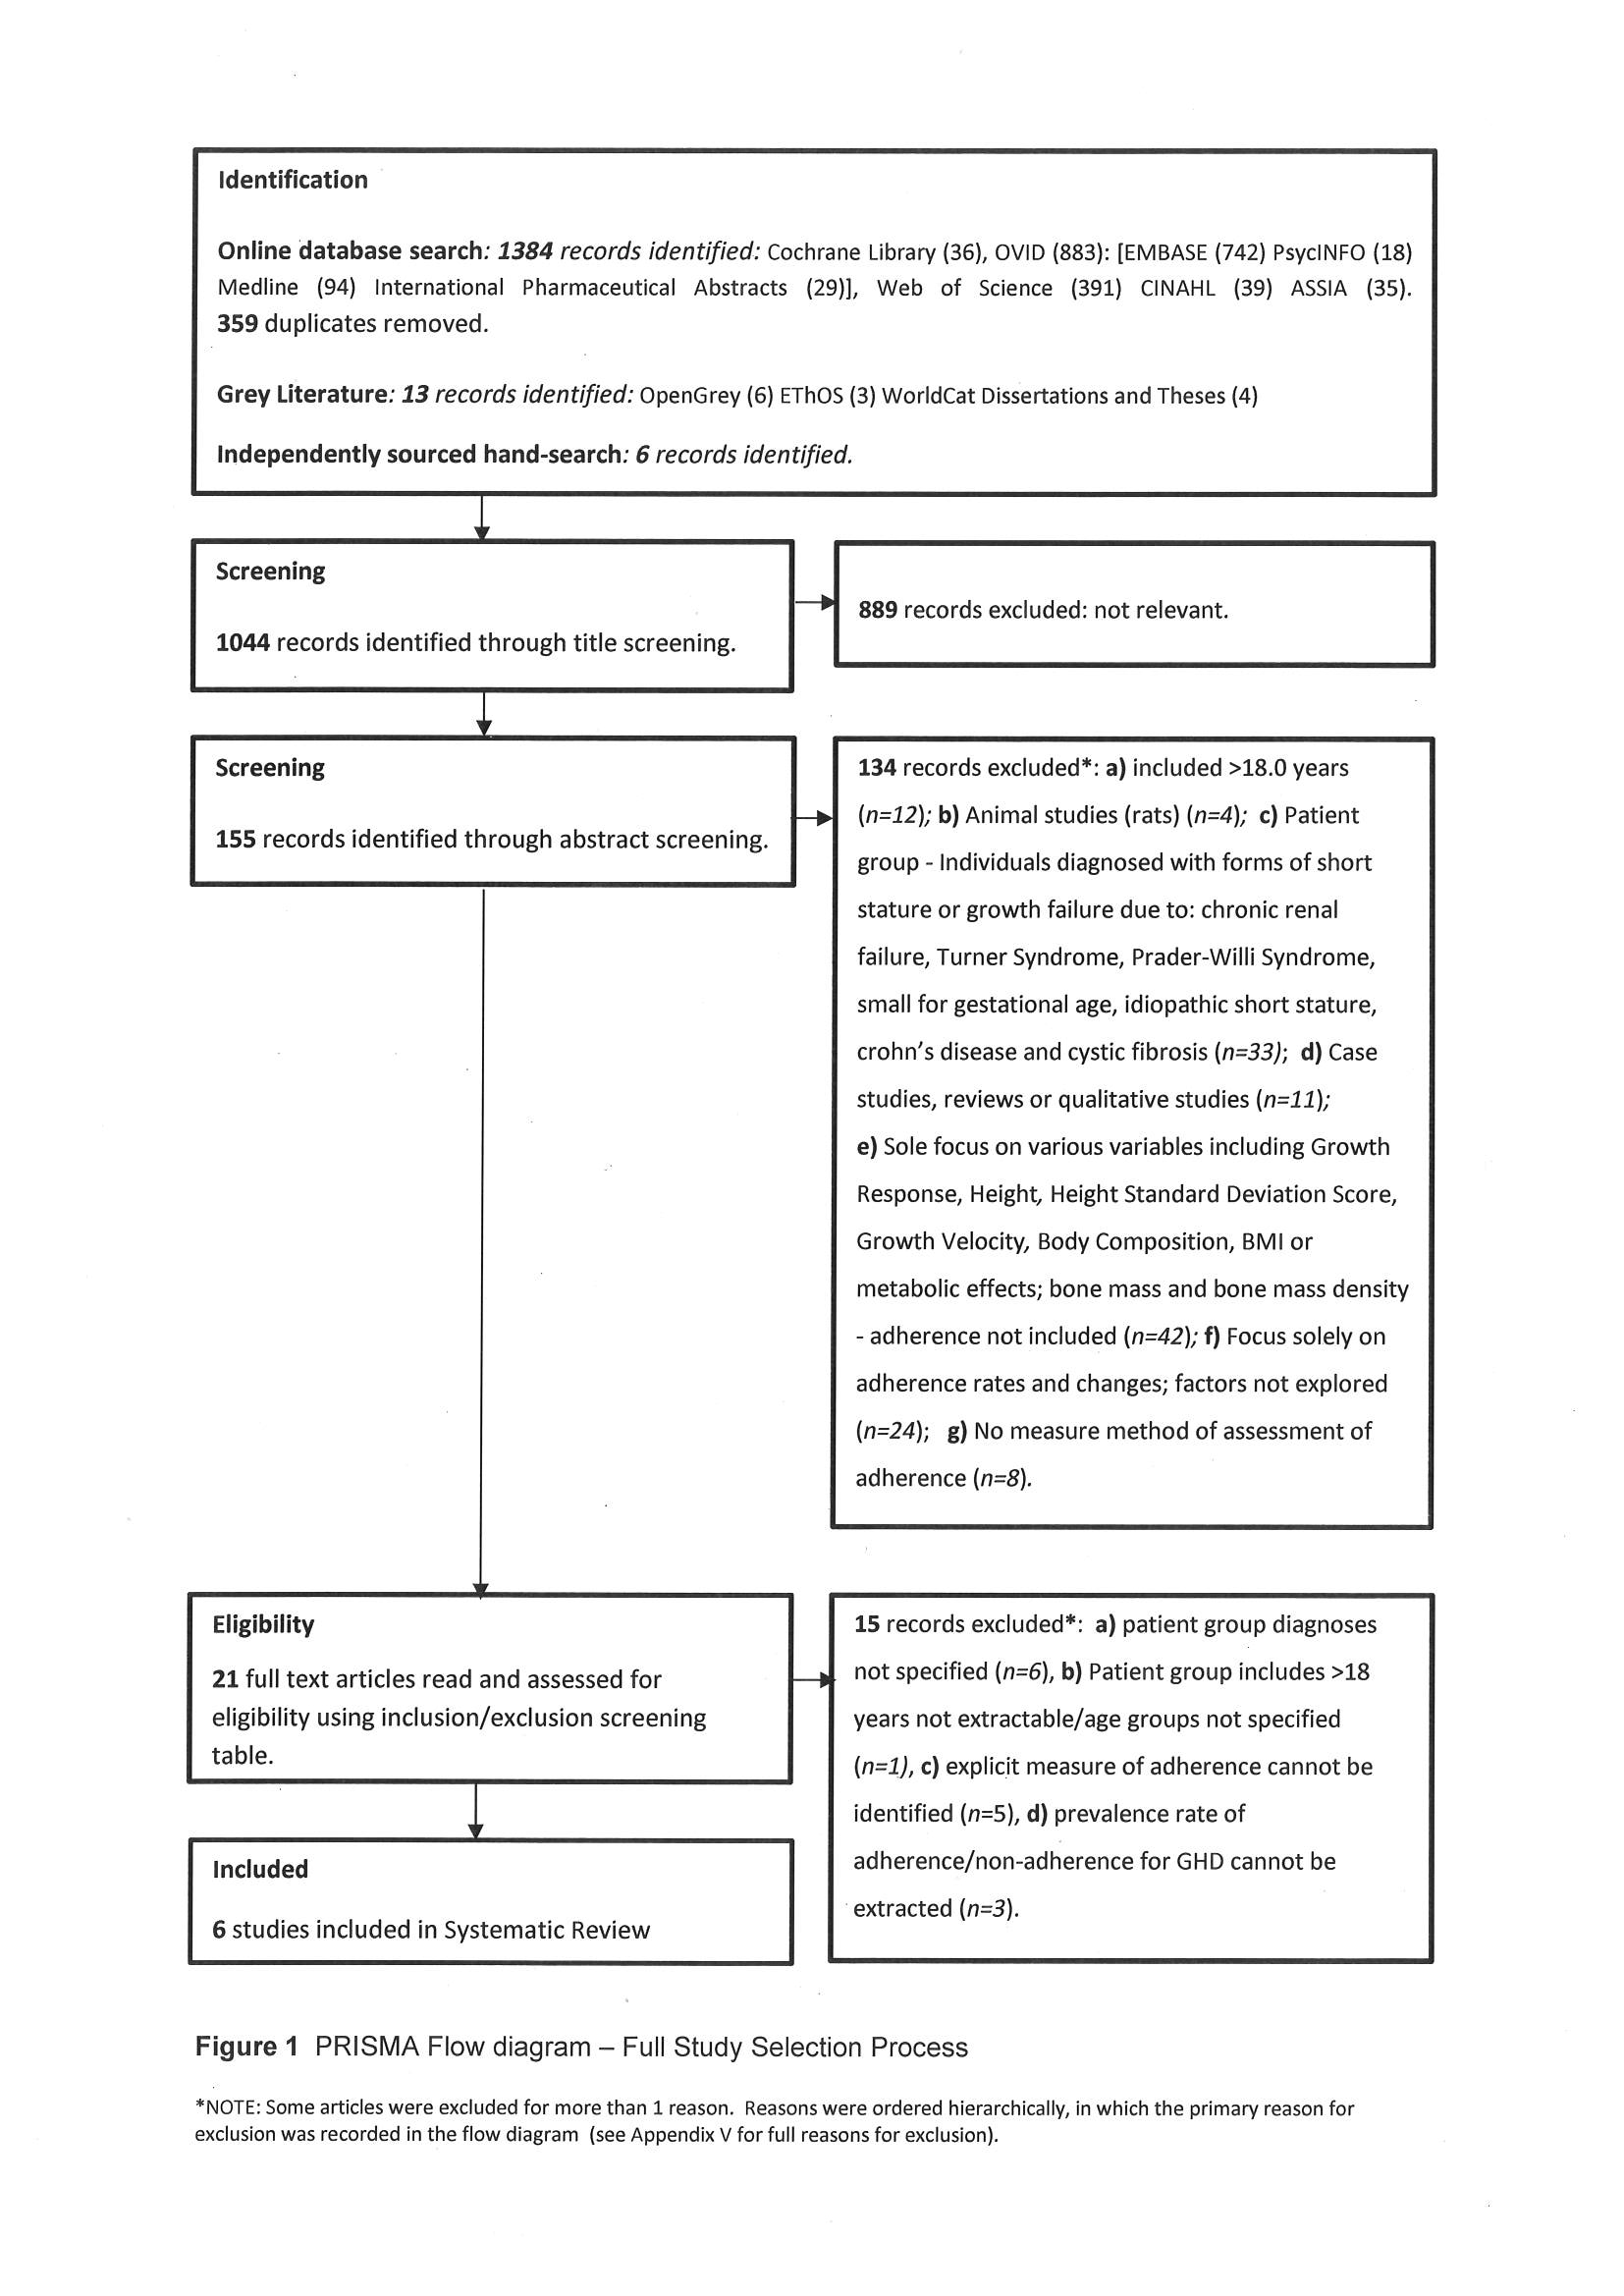
**

Supplement: Supplementary file 1 [file 13755515]
